# Supplementary material for: The role of iodide in the formation of lithium hydroxide in lithium–oxygen batteries
Source: Royal Society of Chemistry journal article supplement (doi:10.1039/c7ee00954b), 2017-01-01
Supplement: c7ee00954b1.pdf [file c7ee00954b1.pdf]

## SUPPORTING INFORMATION

### The role of iodide on the formation of lithium hydroxide in lithium-oxygen batteries

M. Tułodziecki<sup>\*a</sup>, G. M. Leverick<sup>b</sup>, C. V. Amanchukwu<sup>c</sup>, Yu Katayama<sup>b,d</sup>, D. G. Kwabi<sup>b</sup>, Paula T. Hammond<sup>c</sup>, Fanny Bardé<sup>e</sup> and Yang Shao-Horn<sup>\*a, b, f</sup>

<sup>a</sup>Research Laboratory of Electronics, Massachusetts Institute of Technology, 77 Massachusetts Avenue, Cambridge, Massachusetts 02139, USA

<sup>b</sup>Department of Mechanical Engineering, Massachusetts Institute of Technology, 77 Massachusetts Avenue, Cambridge, Massachusetts 02139, USA

<sup>c</sup>Department of Chemical Engineering, Massachusetts Institute of Technology, 77 Massachusetts Avenue, Cambridge, Massachusetts 02139, USA

<sup>d</sup>Department of Energy Hydrocarbon Chemistry, Graduate School of Engineering, Kyoto University, Kyoto 615-8510, Japan

<sup>e</sup>Research & Development 3, Advanced Technology 1, Toyota motor Europe, Hage Wei 33 B, B-1930 Zaventem, Belgium

<sup>f</sup>Department of Materials Science and Engineering, Massachusetts Institute of Technology, 77 Massachusetts Avenue, Cambridge, Massachusetts 02139, USA

\* Corresponding author: [michalt@mit.edu](mailto:michalt@mit.edu), [shaohorn@mit.edu](mailto:shaohorn@mit.edu)

Key Words: Li-oxygen battery; Redox mediator; Discharge mechanism; Lithium iodide; Triiodide

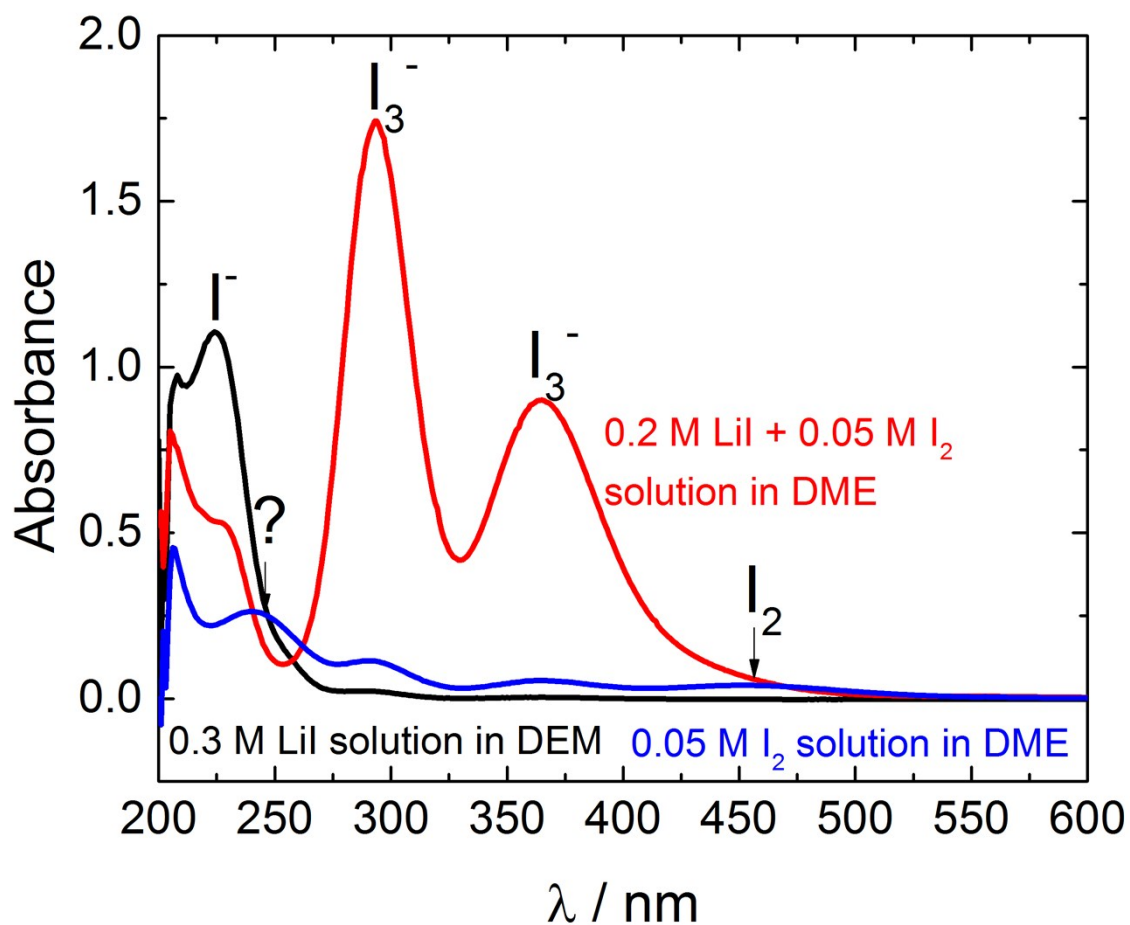

Figure S1. UV-Vis spectra of diluted stock solutions 0.3 M LiI – black curve, 0.2 M LiI + 0.0025 M  $\text{I}_2$  – red curve and 0.05 M  $\text{I}_2$  – blue curve. The spectra show the characteristic absorbance of  $\text{I}^-$  (223 nm),  $\text{I}_3^-$  (293 and 365 nm) and  $\text{I}_2$  (245 nm, 451 nm). The observed peak at 240 nm for solution with  $\text{I}_2$  is so far unidentified. It could be due to formation of either specific solvent- $\text{I}^-$  or solvent- $\text{I}^+$  complexes.<sup>1</sup>

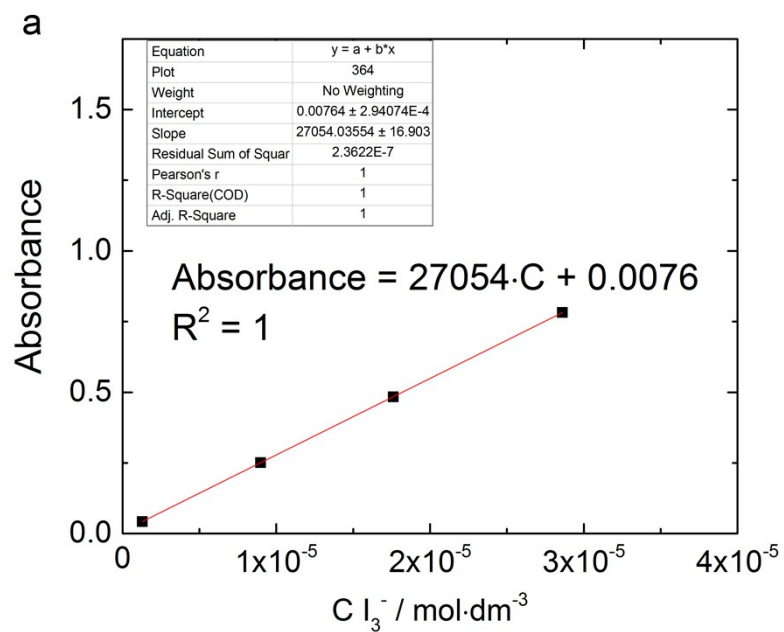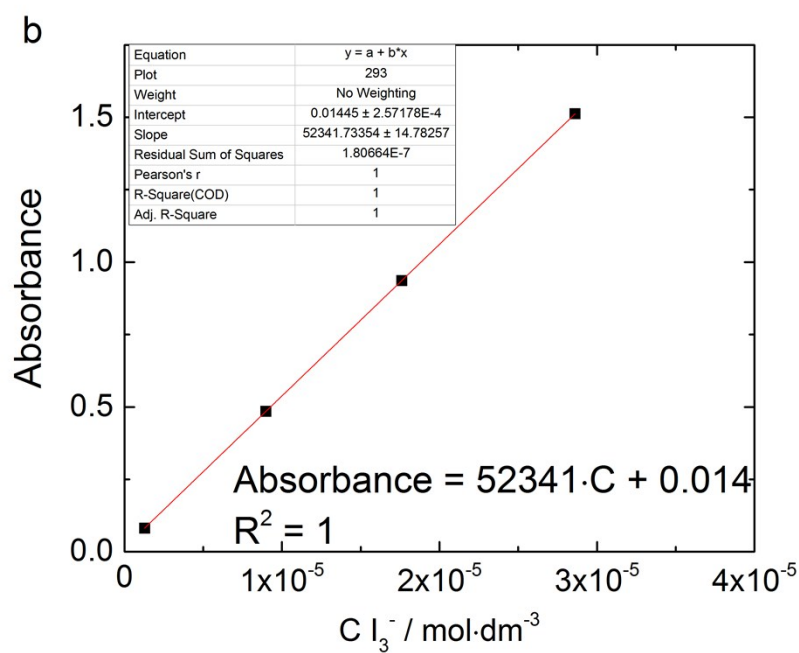

Figure S2 Calibration of  $\text{I}_3^-$  concentration done by measurement of different dilutions of stock solution 0.2 M LiI + 0.005M  $\text{I}_2$  in DME a) signal at 364 nm b) signal at 293 nm

Table S1. Calculations of the triiodide concentration and the scale factor for figure plotting.

|           | sample                                                       | dilute 1                        | dilute 2                       | dilute 3       | Absorption |      | $\Delta C$<br>$I_3^- / \text{mM}$ | #Factor<br>plotted /<br>measured | Titration<br>$C I_3^- /$<br>mM |
|-----------|--------------------------------------------------------------|---------------------------------|--------------------------------|----------------|------------|------|-----------------------------------|----------------------------------|--------------------------------|
|           |                                                              |                                 |                                |                | 293        | 364  |                                   |                                  |                                |
| Figure 1  | 0.1M $KO_2$ , 0.3 M LiTFSI, 40 ppm $H_2O$ , 0.5 h            | -                               | -                              | -              | -          | -    | -                                 | -                                | -                              |
|           | 0.1M $KO_2$ , 0.3 M LiTFSI, 1000 ppm $H_2O$ , 8 h            | -                               | -                              | -              | -          | -    | -                                 | -                                | -                              |
|           | 0.1M $KO_2$ , 0.2 M LiI, 0.1 M LiTFSI, 40 ppm $H_2O$ , 0.5 h | 100 $\mu\text{l}$ + 3 ml DME    | -                              | -              | 2.06       | 1.07 | $1.20 \pm 0.01$                   | 0.05                             | $1.2 \pm 0.3$                  |
|           | 0.1M $KO_2$ , 0.2 M LiI, 0.1 M LiTFSI, 1000 ppm $H_2O$ , 8 h | 100 $\mu\text{l}$ + 3 ml DME    | 100 $\mu\text{l}$ + 3 ml DME   | 1 ml + 2ml DME | 0.46       | 0.24 | $24.5 \pm 0.8$                    | 2.1                              | $24.4 \pm 0.3$                 |
|           | 0.1M $KO_2$ , 0.2 M LiI, 0.1 M LiTFSI, 2000 ppm $H_2O$ , 8 h | 100 $\mu\text{l}$ + 3 ml DME    | 100 $\mu\text{l}$ + 3 ml DME   | 1 ml + 2ml DME | 0.91       | 0.47 | $49 \pm 1$                        | 2.1                              | $49.3 \pm 0.3$                 |
|           | 0.1M $KO_2$ , 0.2 M LiI, 0.1 M LiTFSI, 3000 ppm $H_2O$ , 8 h | 100 $\mu\text{l}$ + 3 ml DME    | 100 $\mu\text{l}$ + 3 ml DME   | 1 ml + 2ml DME | 0.95       | 0.49 | $51 \pm 2$                        | 2.1                              | $50.6 \pm 0.3$                 |
| Figure 3a | 0.3 M LiI, 40 ppm $H_2O$ , Argon, 1 week                     | -                               | -                              | -              | -          | -    | -                                 | -                                | -                              |
|           | 0.3 M LiI, 40 ppm $H_2O$ , Oxygen, 1 week                    | 50 $\mu\text{l}$ + 0.55 ml DME  | -                              | -              | 1.46       | 0.76 | $0.312 \pm 0.03$                  | 0.9                              | -                              |
|           | 0.3 M LiI, 1000 ppm $H_2O$ , Oxygen, 1 week                  | 100 $\mu\text{l}$ + 1.0 ml DME  | 100 $\mu\text{l}$ + 1.0 ml DME | -              | 0.62       | 0.32 | $0.95 \pm 0.02$                   | 3                                | -                              |
| Figure 3b | 0.1M $KO_2$ , 0.3 M KI, 40 ppm $H_2O$ , 2 days               | 300 $\mu\text{l}$ + 0.55 ml DME | -                              | -              | -          | -    | <0.01                             | 1                                | -                              |
|           | 0.1M $KO_2$ , 0.3 M KI, 1000 ppm $H_2O$ , 2 days             | 100 $\mu\text{l}$ + 0.55 ml DME | -                              | -              | 0.13       | -    | <0.01                             | 1                                | -                              |
| Figure 3c | $Li_2O_2$ , 0.3 M LiI, 40 ppm $H_2O$ , 2 days                | 10 $\mu\text{l}$ + 0.55 ml DME  | -                              | -              | 0.70       | 0.36 | $0.729 \pm 0.007$                 | 1                                | -                              |
|           | $Li_2O_2$ , 0.3 M LiI, 1000 ppm $H_2O$ , 2 days              | 10 $\mu\text{l}$ + 0.55 ml DME  | -                              | -              | 0.97       | 0.51 | $1.03 \pm 0.01$                   | 1                                | -                              |
|           | $Li_2O_2$ , 0.3 M LiI, 5000 ppm $H_2O$ , 2 days              | 10 $\mu\text{l}$ + 2.55 ml DME  | -                              | -              | 0.74       | 0.38 | $3.57 \pm 0.04$                   | 3.6                              | -                              |

|           | sample                                                                                           | dilute 1                  | dilute 2                | dilute 3          | Absorption |      | $^{\wedge}C_{I_3^-} / \text{mM}$ | #Factor plotted / measured | Titration $C_{I_3^-} / \text{mM}$ |
|-----------|--------------------------------------------------------------------------------------------------|---------------------------|-------------------------|-------------------|------------|------|----------------------------------|----------------------------|-----------------------------------|
|           |                                                                                                  |                           |                         |                   | 293        | 364  |                                  |                            |                                   |
| Figure 3d | 0.1M KO <sub>2</sub> , 0.3 M LiTFSI, 40 ppm H <sub>2</sub> O + 0.2 M LiI, 0.5 h                  | 100 $\mu$ l + 3 ml DME    | -                       | -                 | 1.05       | 0.55 | $0.627 \pm 0.006$                | 0.2                        | $0.6 \pm 0.3$                     |
|           | 0.1M KO <sub>2</sub> , 0.3 M LiTFSI, 40 ppm H <sub>2</sub> O + 0.2 M LiI, 16 h                   | 100 $\mu$ l + 1.55 ml DME | -                       | -                 | 1.00       | 0.50 | $0.311 \pm 0.003$                | -                          | -                                 |
|           | 0.1M KO <sub>2</sub> , 0.3 M LiTFSI, 1000 ppm H <sub>2</sub> O + 0.2 M LiI, 24 h                 | 100 $\mu$ l + 3 ml DME    | 100 $\mu$ l + 3 ml DME  | -                 | 1.25       | 0.64 | $23.0 \pm 0.5$                   | 1                          | $23.1 \pm 0.3$                    |
| Figure 5c | 0.1M KO <sub>2</sub> , 0.3 M LiI, H <sub>2</sub> O:LiI = 0.25, H <sub>2</sub> O:DME = 0.01, 24 h | 50 $\mu$ l + 3 ml DME     | 100 $\mu$ l + 1 ml DME  | 0.5 ml + 3 ml DME | 0.70       | 0.26 | $44 \pm 1$                       | -                          | -                                 |
|           | 0.1M KO <sub>2</sub> , 0.3 M LiI, H <sub>2</sub> O:LiI = 0.50, H <sub>2</sub> O:DME = 0.02, 24 h | 50 $\mu$ l + 3 ml DME     | 100 $\mu$ l + 1 ml DME  | 0.5 ml + 3 ml DME | 0.75       | 0.29 | $48 \pm 1.5$                     | -                          | -                                 |
|           | 0.1M KO <sub>2</sub> , 0.3 M LiI, H <sub>2</sub> O:LiI = 1.00, H <sub>2</sub> O:DME = 0.03, 24 h | 50 $\mu$ l + 3 ml DME     | 100 $\mu$ l + 1 ml DME  | 0.5 ml + 3 ml DME | 0.76       | 0.30 | $49 \pm 1.5$                     | -                          | -                                 |
|           | 0.1M KO <sub>2</sub> , 0.3 M LiI, H <sub>2</sub> O:LiI = 2.00, H <sub>2</sub> O:DME = 0.06, 24 h | 50 $\mu$ l + 3 ml DME     | 100 $\mu$ l + 1 ml DME  | 0.5 ml + 3 ml DME | 0.71       | 0.27 | $45 \pm 1$                       | -                          | -                                 |
|           | 0.1M KO <sub>2</sub> , 0.3 M LiI, H <sub>2</sub> O:LiI = 5.00, H <sub>2</sub> O:DME = 0.16, 24 h | 50 $\mu$ l + 1 ml DME     | 50 $\mu$ l + 2.5 ml DME | -                 | 0.80       | 0.32 | $12.4 \pm 0.2$                   | -                          | -                                 |
|           | 0.1M KO <sub>2</sub> , 0.3 M LiI, H <sub>2</sub> O:LiI = 12.0, H <sub>2</sub> O:DME = 0.40, 24 h | 0.5 ml + 2 ml DME         | -                       | -                 | 0.61       | 0.32 | $0.06 \pm 0.0006$                | -                          | -                                 |
|           | 0.1M KO <sub>2</sub> , 0.3 M LiI, H <sub>2</sub> O:LiI = 24.0, H <sub>2</sub> O:DME = 0.86, 24 h | 1.5 ml + 1 ml DME         | -                       | -                 | 0.03       | 0.01 | $<0.0001$                        | -                          | -                                 |

\*Absorptions intensities at  $\lambda_1 = 293 \text{ nm}$  and  $\lambda_2 = 364 \text{ nm}$ .  $^{\wedge}$  Calculated concentration of  $I_3^-$  from the average of the two absorption bands unless one of the absorbance is out of calibration scale then only one wavelength was used. # Factor by which the measured data is scaled in order to visualize the difference in triiodide concentration in the manuscript figures. The  $I_3^-$  concentration error (determined from UV-Vis method) comes mostly from the pipetting procedure that varies depending on the number of dilutions and is estimated to 1%, 2% and 3% for 1, 2 and 3 dilutions, respectively. The  $I_3^-$  concentration error (determined from iodometric titration) is based on the burette tolerance of  $\pm 0.05 \text{ ml}$  and equal to  $\pm 0.3 \text{ mM}$ .

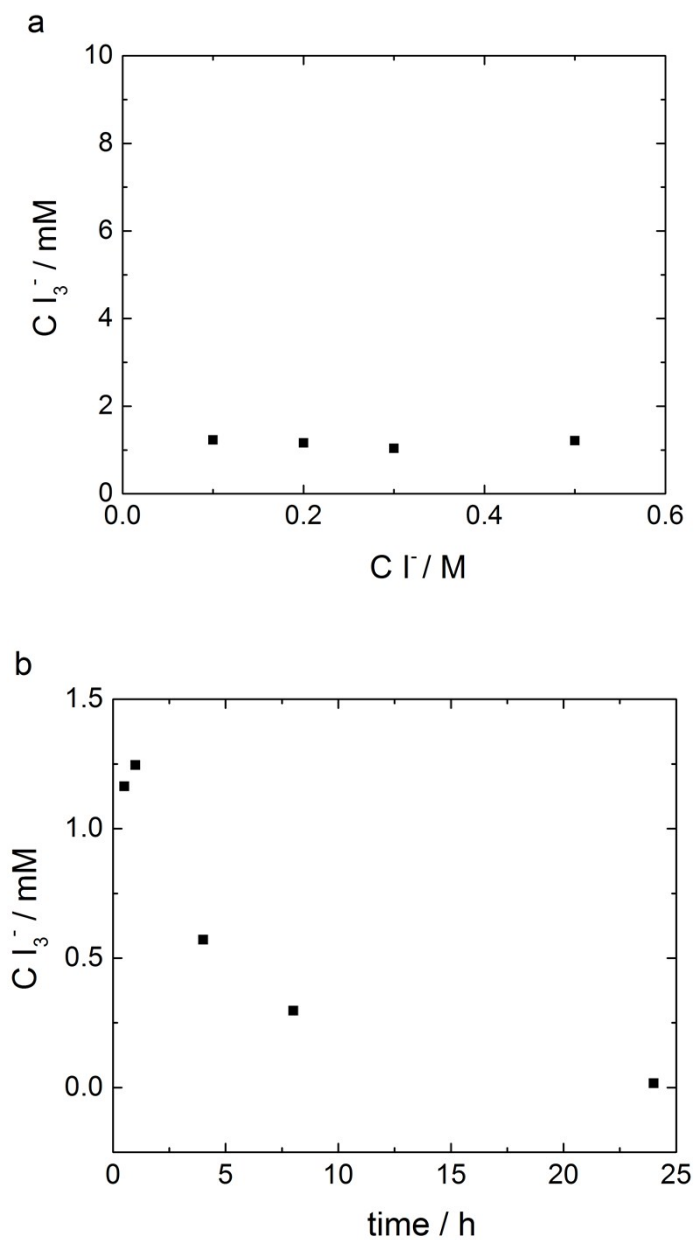

Figure S3. a) The  $LiI$  concentration dependence of  $I_3^-$  concentration after 30 min of reaction. The solutions tested were I) 0.1 M  $LiI$  + 0.2 M  $LiTFSI$ , II) 0.2 M  $LiI$  + 0.1 M  $LiTFSI$ , III) 0.3 M  $LiI$  and IV) 0.5 M  $LiI$ . b) The time dependence of  $I_3^-$  concentration in solution where 0.1 M  $KO_2$  was directly added to 0.2 M  $LiI$  + 0.1 M  $LiTFSI$  solution in DME with 40 ppm  $H_2O$ . In all cases, the data is based on UV-Vis measurements only, as titration of the solutions with such small concentrations results in big errors. Each data point was obtained from separate new experiment.

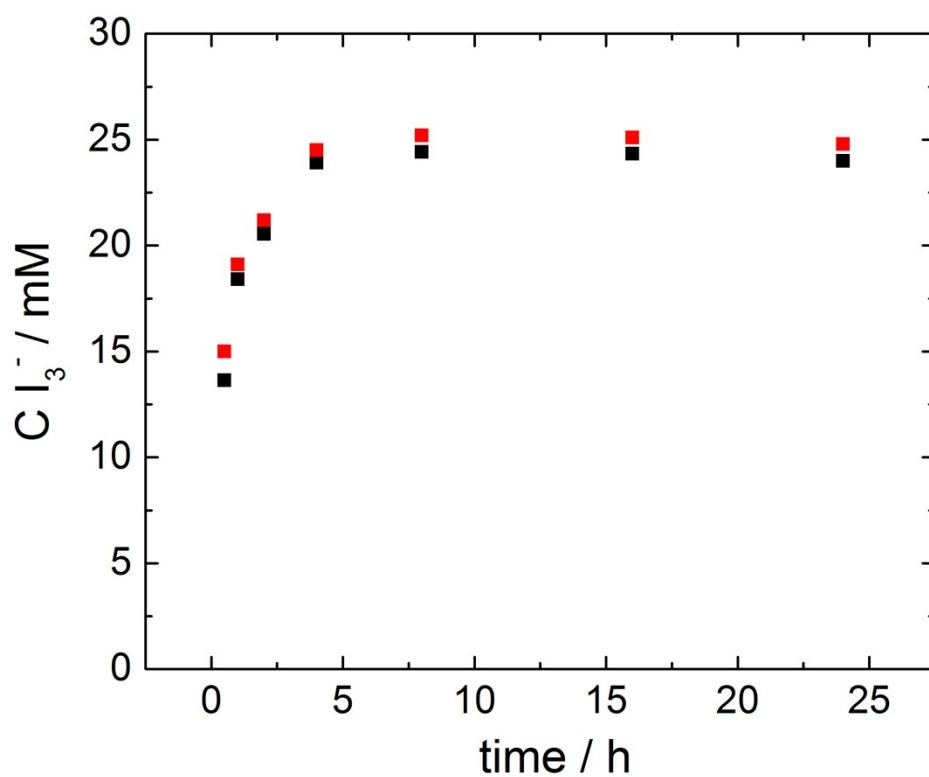

Figure S4. The time dependence of  $I_3^-$  concentration in solution where 0.1M  $KO_2$  was directly added to 0.2 M LiI + 0.1 M LiTFSI solution in DME with 1000 ppm  $H_2O$ . Red squares correspond to values obtained from UV-Vis measurements, while black squares from iodometric titration. In general a good agreement between both techniques is observed. Each data point was obtained from separate new experiment.

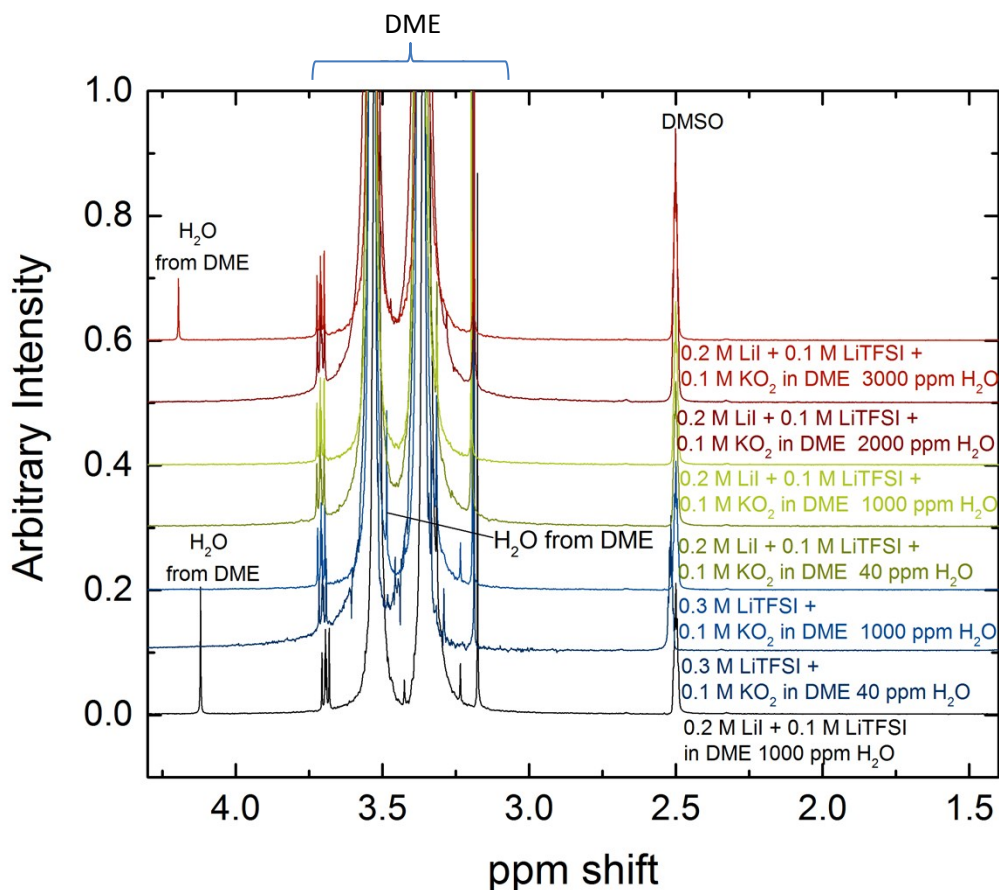

Figure S5  $^1\text{H}$ NMR spectra of liquid phase from Figure 1. The spectra show no evidence for decomposition of DME. Moreover, the signal from  $\text{H}_2\text{O}$  (at  $\sim 4.2$  ppm) disappeared after addition of  $\text{KO}_2$  for all the samples containing Lil except the one containing 3000 ppm of  $\text{H}_2\text{O}$  (bright red). This confirms participation of  $\text{H}_2\text{O}$  in chemical processes during disproportionation reaction and formation of triiodide. For sample with 3000 ppm of  $\text{H}_2\text{O}$  no further increase of  $\text{I}_3^-$  was observed that corresponds to presence of unreacted  $\text{H}_2\text{O}$  and lack of  $\text{Li}_2\text{O}_2$  phase. Sample with 1000 ppm  $\text{H}_2\text{O}$  and only LiTFSI salt (bright blue) showed also strong signal from  $\text{H}_2\text{O}$  at around 3.5 ppm, indicating lack of its consumption during disproportionation reaction. The shifts of the  $\text{H}_2\text{O}$  position are explained in the manuscript Figure 4a. The liquid part of sample was placed inside the capillary and closed with the Teflon cap. Next, the capillary was placed inside the NMR tube that contained the deuterated DMSO solvent. In such manner we avoid direct mixing of reference and sample solution, so that we can probe specific interactions between the species in the studied solution.



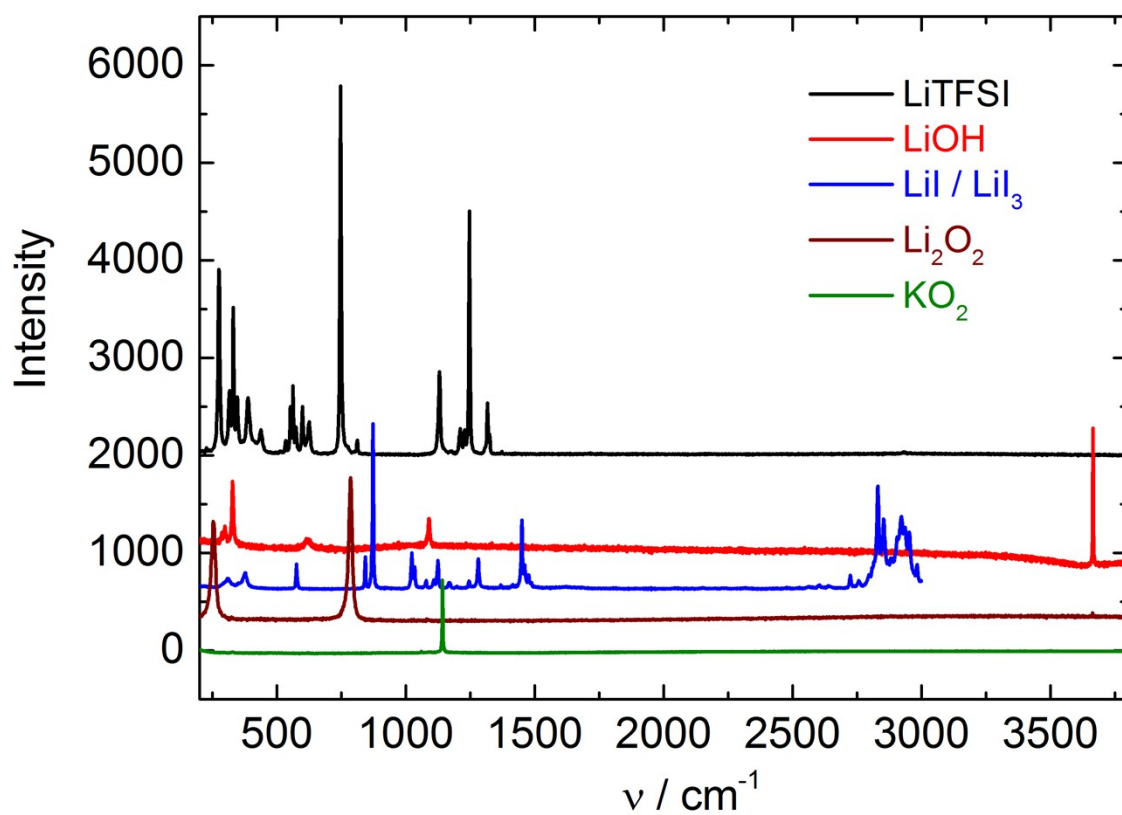

Figure S6. Reference Raman spectra of pure substances. In case of Lil powder, the spectra was evolving during the data acquisition due to oxidation of  $\text{I}^-$  by red laser. Pure Lil does not reveal any signal in the presented range, on the other hand  $\text{I}_3^-$  has multiple signals as seen on blue spectra.

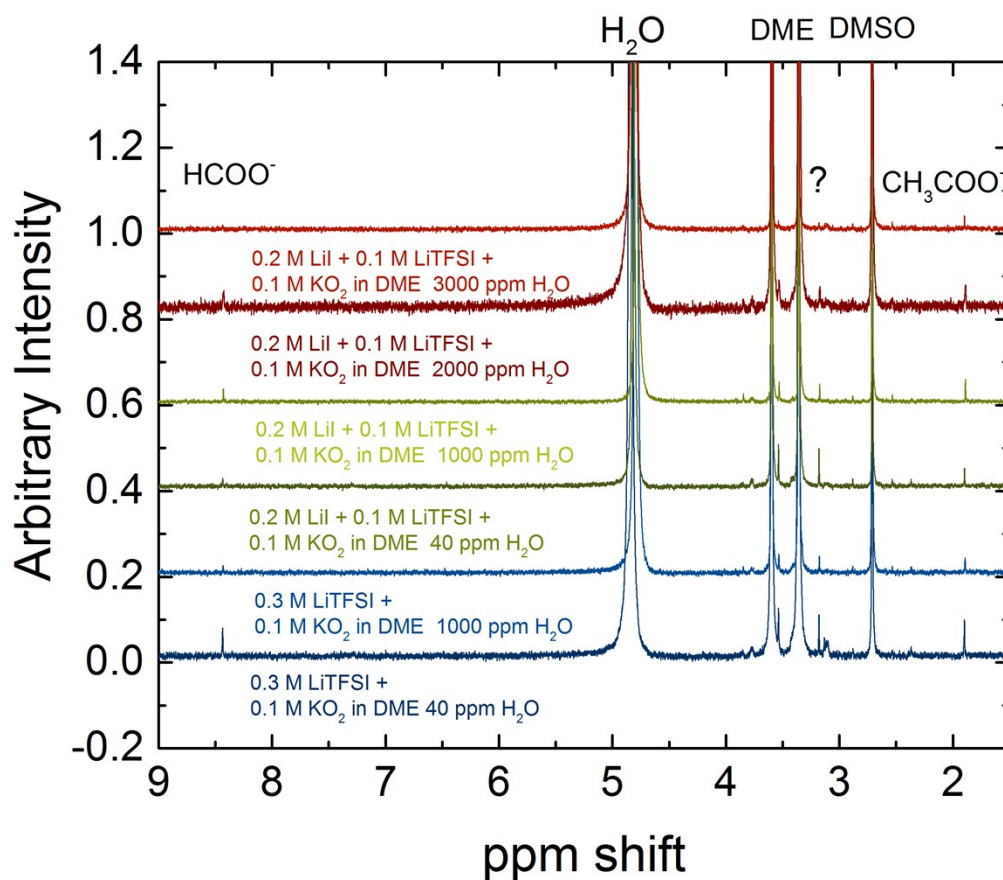

Figure S7  $^1\text{H}$  NMR spectra of the solid phase from Figure 1. The spectra show tiny amounts of DME decomposition products  $\text{HCOO}^-$  and  $\text{CH}_3\text{COO}^-$  at 8.5 ppm and 1.9 ppm shifts. The concentration of the decomposition products in the solution for  $^1\text{H}$  NMR analysis was around 0.1-0.2 mM (considering 3mM concentration of DMSO) that corresponds to 0.1-0.2 mM concentration in the reaction solution as the same volumes of the solutions were used. Signal at 4.9 ppm corresponds to  $\text{H}_2\text{O}$ . 2 Strong signals at 3.4 and 3.6 ppm correspond to residual DME. Signal at 2.7 ppm corresponds to DMSO. Small signals at 3.2 ppm could not be identified, however it probably comes from initial impurities of DME as such signals were present in the pristine solution, Figure S5 black curve. The solid part was first dissolved in  $\text{D}_2\text{O}$  solution with added known amount of DMSO (3 mM) for quantification purpose. The resulted solution was directly placed in the NMR tube (no capillary).

### Detailed description on the possibilities of I<sup>-</sup> oxidation

Iodide can be oxidized to triiodide by peroxy like species as hydrogen peroxide<sup>2</sup> or hydroperoxy anion, reactions 1-4<sup>3</sup>.

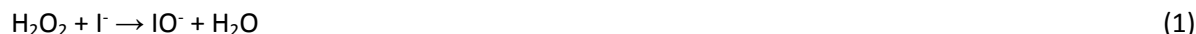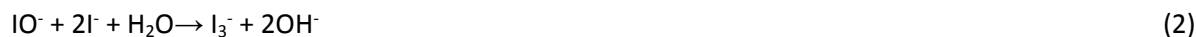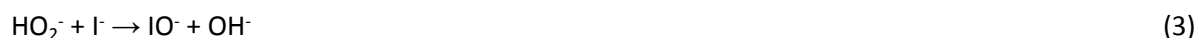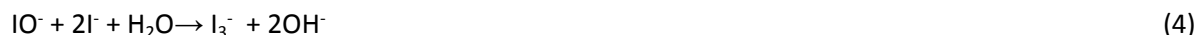

In fact, iodide is used as an indicator of H<sub>2</sub>O<sub>2</sub> due to the high absorption coefficient of triiodide that allows detection of trace H<sub>2</sub>O<sub>2</sub> (0.05 mg/dm<sup>3</sup>)<sup>2</sup>. Indeed H<sub>2</sub>O<sub>2</sub> species in absence of iodide were detected by the quantofix stripes at concentration of 2 mg/L. Formation of hydrogen peroxide and its related species can occur in few different reaction paths in Li-air battery:

i) superoxide ion reaction<sup>4-7</sup> with water<sup>7</sup> or ether based solvent<sup>4</sup> (proton source), reaction 5-7

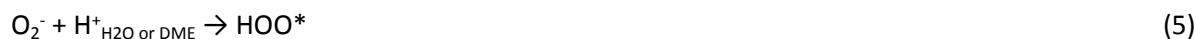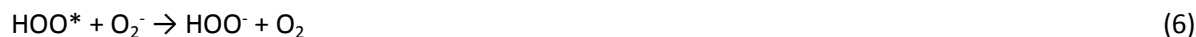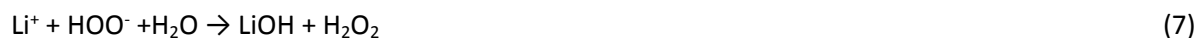

ii) lithium peroxide reaction with water<sup>7</sup> or ether based solvent<sup>8-10</sup>, reaction 8-9

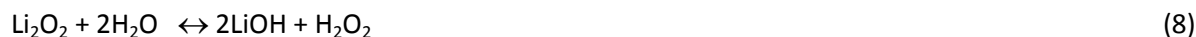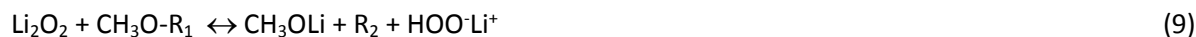

and iii) O<sub>2</sub> reaction with ether based solvent, reaction 10-11<sup>4, 6, 11</sup>.

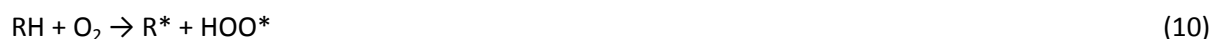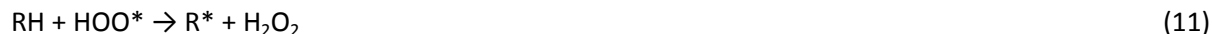

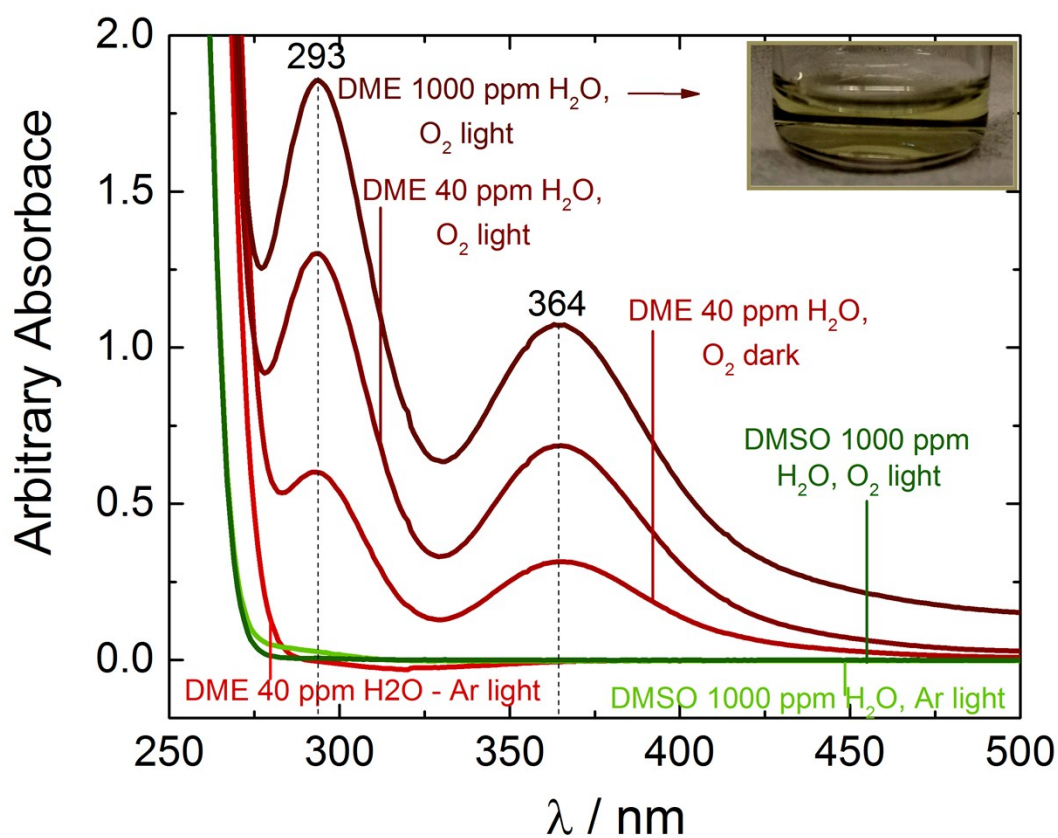

Figure S8. The influence of oxygen, light, and water on the stability of I<sup>-</sup> in solution. UV-Vis spectra of 0.3 M LiI solutions in DME and DMSO. The spectra are taken after 1 week of storage in defined conditions.

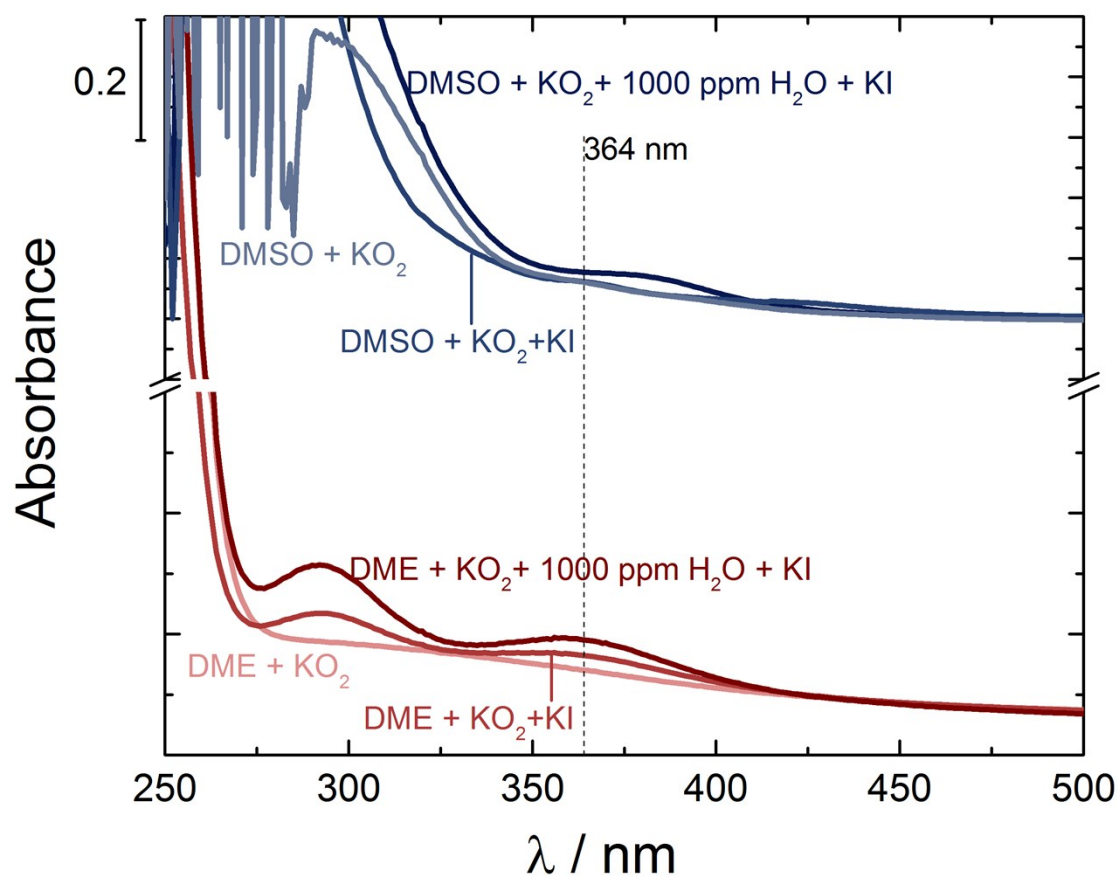

Figure S9. UV-Vis spectra of DME (bottom) and DMSO (top) solutions containing  $\text{KO}_2$  after 2 days. Calculation of the  $\text{I}_3^-$  concentration from absorption values at 293 nm and 364 nm was done after subtraction of the reference DME +  $\text{KO}_2$  spectra to avoid contribution from  $\text{O}_2^-$  absorption. Only small fraction of the added  $\text{KO}_2$  is soluble in the electrolyte, which is higher for DMSO as compare to DME.

**a) Commercial powder**

**b) Disproportionation reaction**

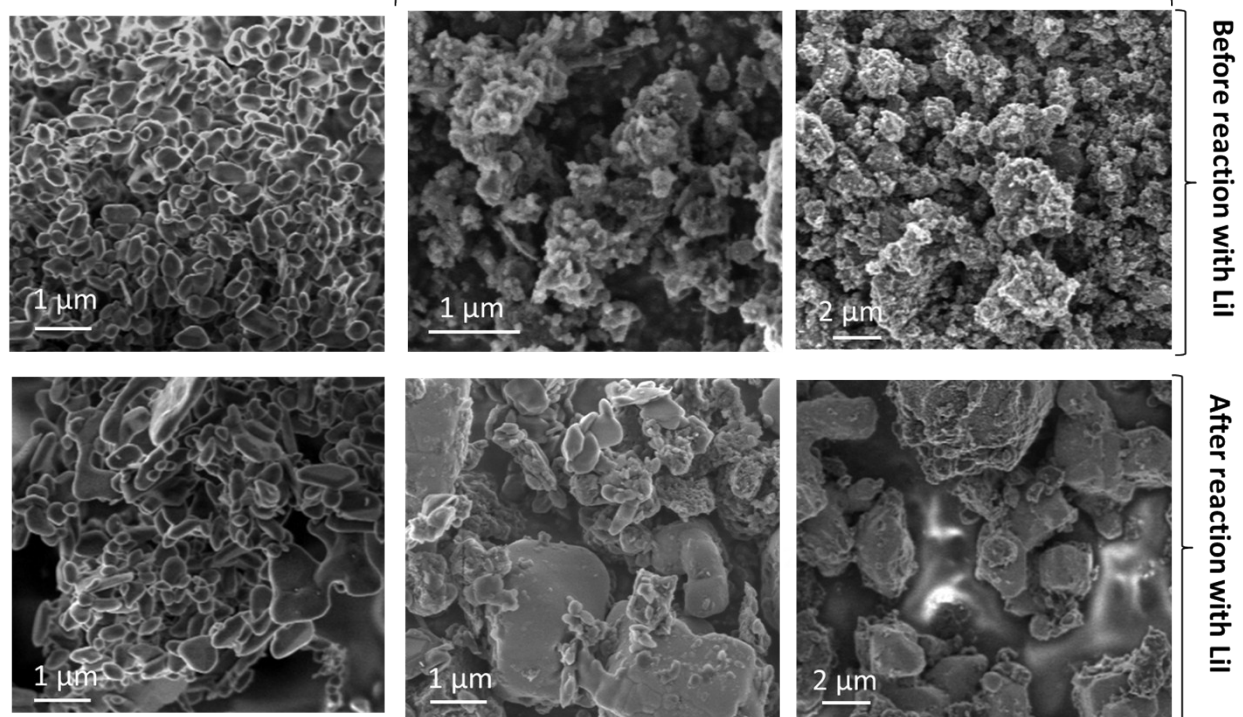

Figure S10 SEM images of a) commercial  $\text{Li}_2\text{O}_2$  and b)  $\text{Li}_2\text{O}_2$  from disproportionation reaction before (top) and after reaction with LiI (bottom).

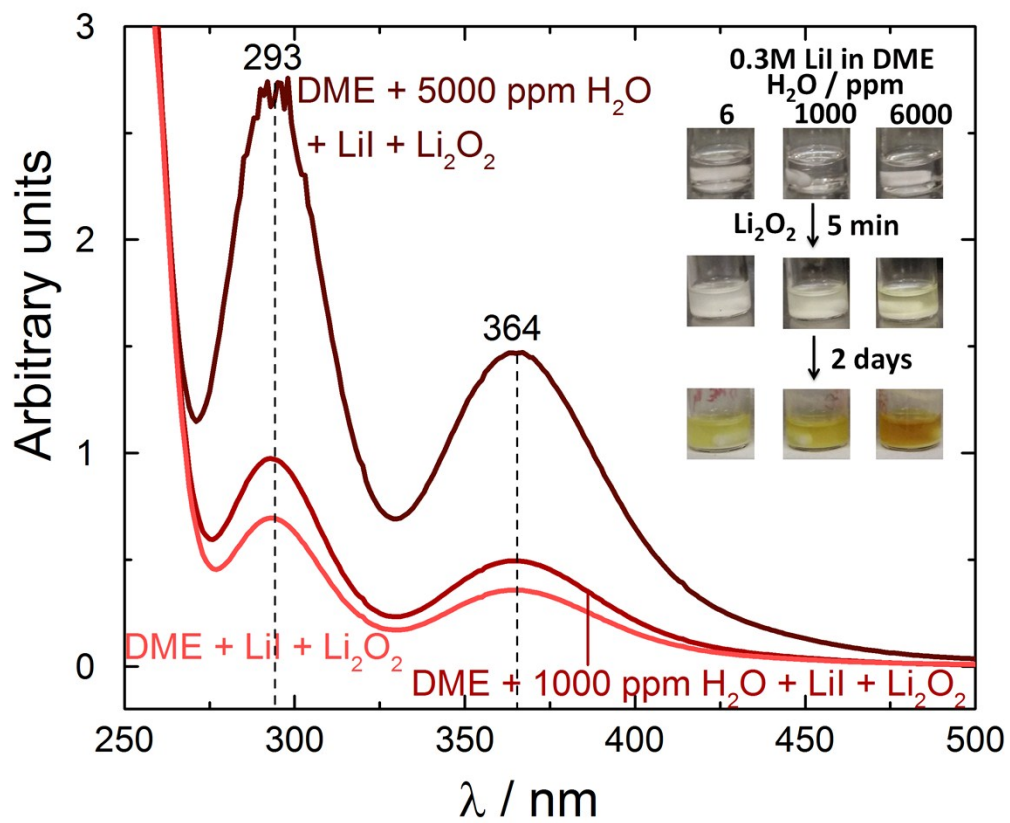

Figure S11. The UV-Vis spectra of 0.3 M Lil mixed with commercial  $\text{Li}_2\text{O}_2$  powder (0.1 g) in DME with 40, 1000 and 5000 ppm  $\text{H}_2\text{O}$  after 2 days. The inset shows optical photographs of the mixture after 5 minutes and 2 days.

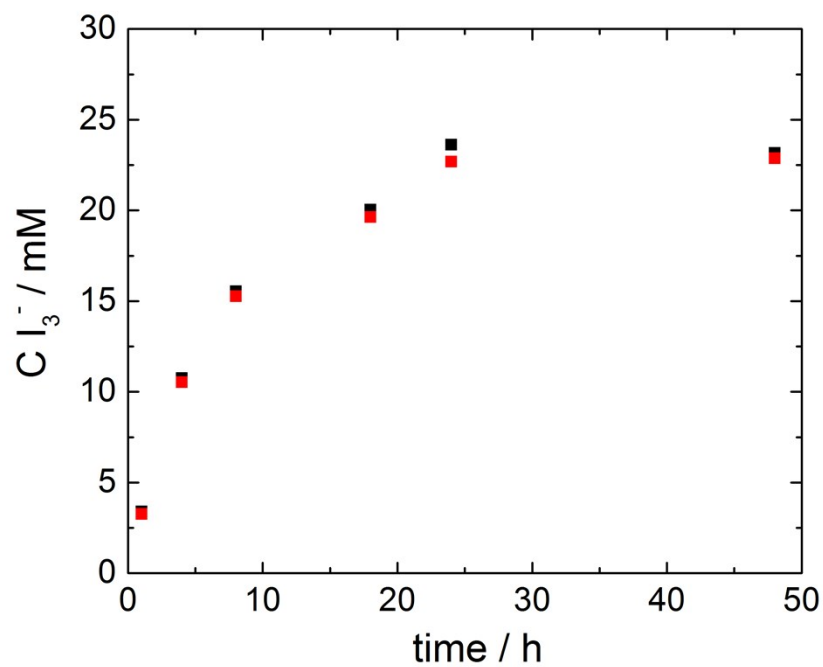

Figure S12. The time dependence of  $I_3^-$  concentration in solution where 0.2 M  $KO_2$  was first added to 0.6 M LiTFSI solution and after 20 min 0.4 M LiI solution was added. The final concentrations of Li salt after mixing the two solutions were 0.3 M LiTFSI and 0.2 M LiI. Both solutions were prepared with DME containing 1000 ppm of  $H_2O$ . Red squares correspond to values obtained from UV-Vis measurements, while black squares from iodometric titration. In general a good agreement between both techniques is observed. Each data point was obtained from separate new experiment.



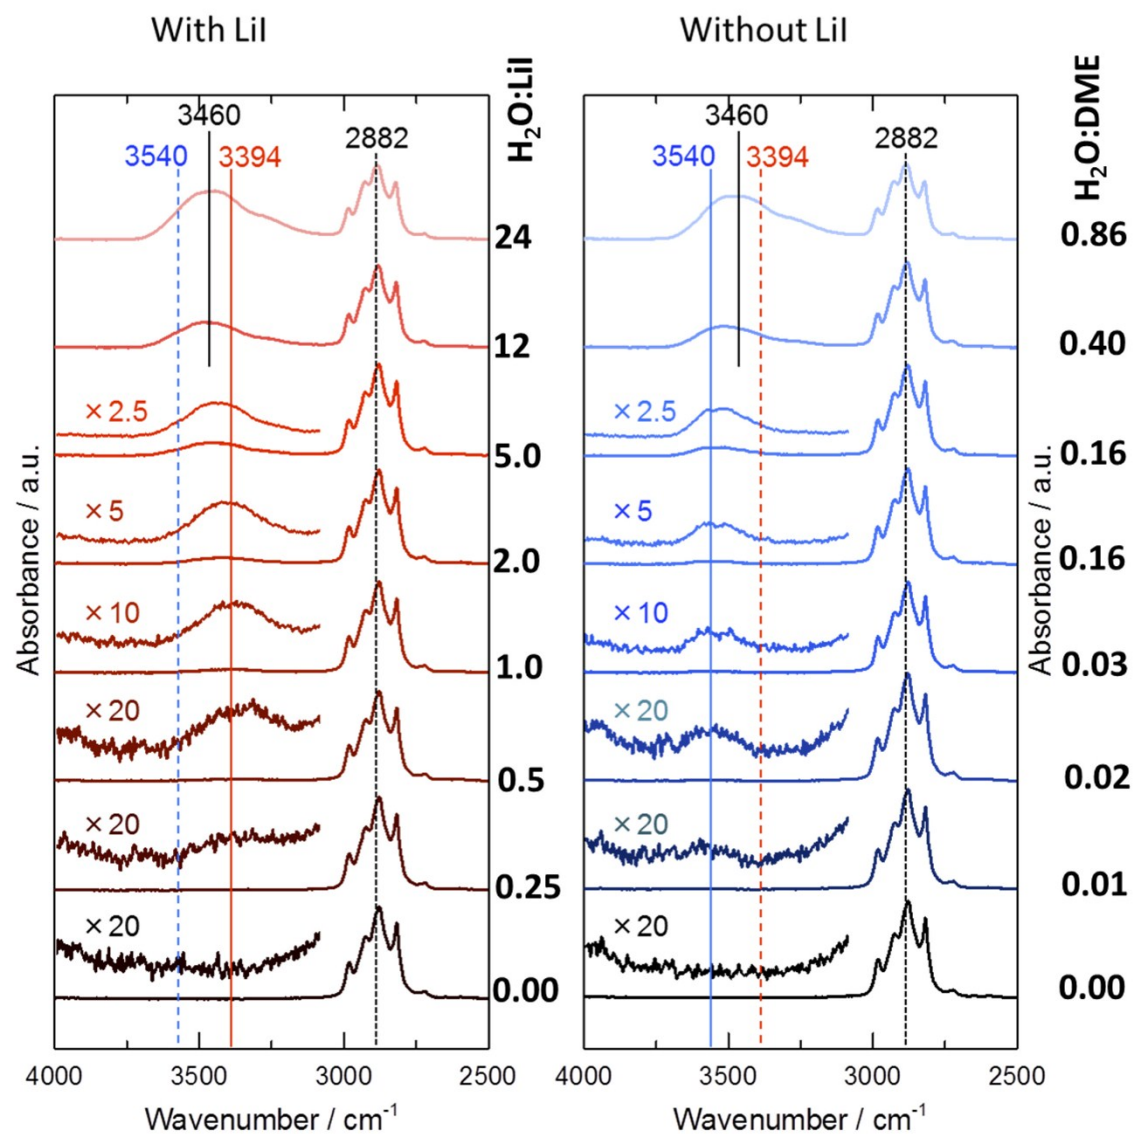

Figure S13. The FT-IR spectra of pure DME and 0.3 M LiI solution in DME with different  $\text{H}_2\text{O}$  content.

## Water H-O-H bending

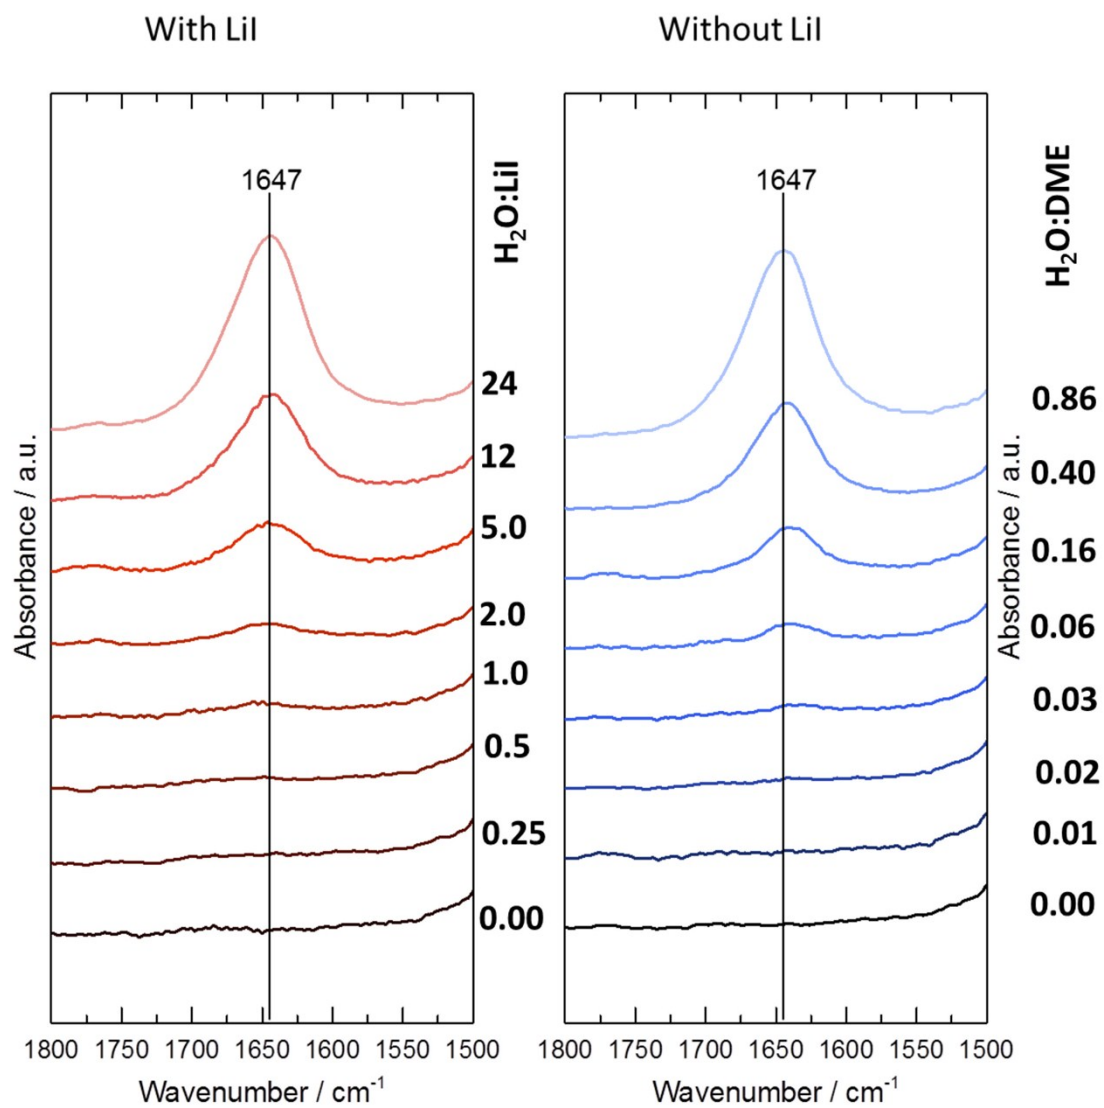

Figure S14. The FT-IR spectra of pure DME and 0.3 M Lil solution in DME with different H<sub>2</sub>O content showing the region of water bending vibration.

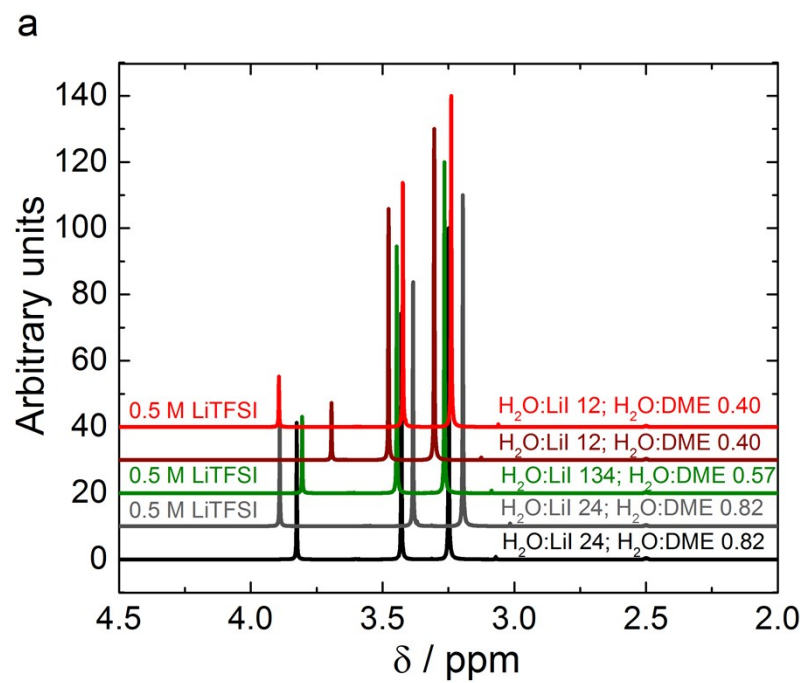

Figure S15. a) <sup>1</sup>H NMR spectra of the pristine electrolytes used to perform disproportionation reaction.

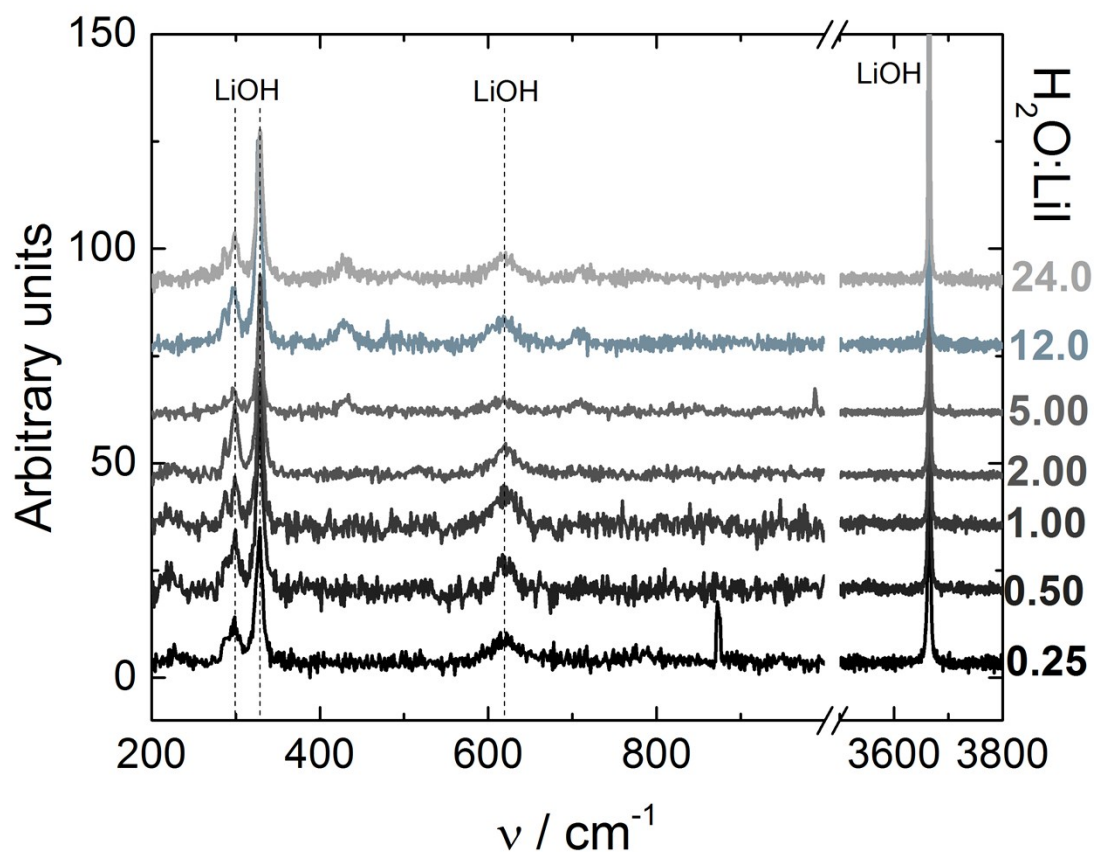

Figure S16 Raman spectra of powders obtained from  $\text{LiO}_2$  disproportionation reaction ( $0.3 \text{ M LiI} + 0.1 \text{ M KO}_2$  24 h) in different  $\text{H}_2\text{O}:\text{DME}$  ratios (The  $\text{LiI}:\text{H}_2\text{O}$  ratio indicated on the right) with reaction time 24 h, the powders were washed 3 times with anhydrous DME before the experiment. The coloring scheme is consistent with Figure 5 a, b.

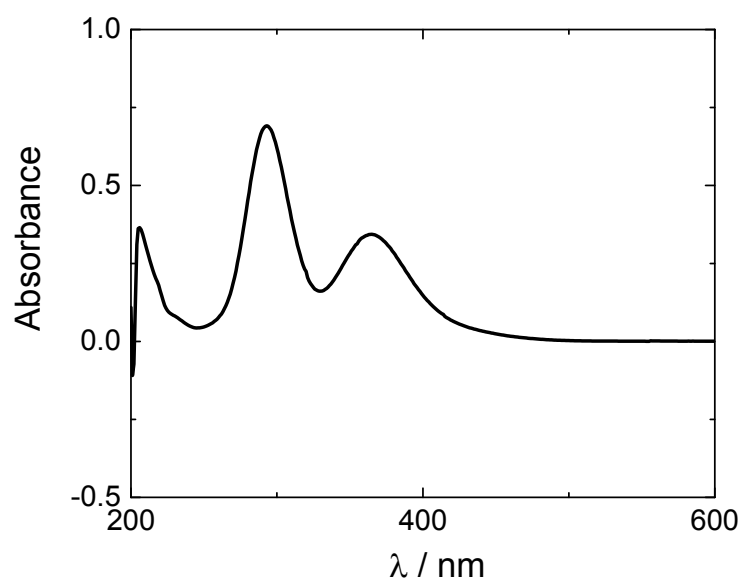

Figure S17. The UV-Vis of diluted electrolyte (0.1M LiI + 0.2M LiTFSI in DME with 1000 ppm H<sub>2</sub>O) coming from discharged battery at 2.7 V.

1. Z. Kebede and S.-E. Lindquist, *Sol. Energ. Mat. Sol. Cells*, 1999, **57**, 259-275.
2. P. J. Brandhuber and G. Korshin, *Methods for the detection of residual concentrations of hydrogen peroxide in advanced oxidation process*, Watereuse Foundation, Alexandria, 2009.
3. M. C. Milenkovic and D. R. Stanisavljev, *Russ. J. Phys. Chem. A*, 2011, **85**, 2279-2282.
4. B. D. Adams, R. Black, Z. Williams, R. Fernandes, M. Cuisinier, E. J. Berg, P. Novak, G. K. Murphy and L. F. Nazar, *Adv. Energy Mater.*, 2015, **5**, 1400867.
5. Y. Che, M. Tsushima, F. Matsumoto, T. Okajima, K. Tokuda and T. Ohsaka, *J. Phys. Chem.*, 1996, **100**, 20134-20137.
6. V. S. Bryantsev and F. Faglioni, *J. Phys. Chem. A*, 2012, **116**, 7128-7138.
7. D. G. Kwabi, T. P. Batcho, S. Feng, L. Giordano, C. V. Thompson and Y. Shao-Horn, *Phys. Chem. Chem. Phys.*, 2016, **18**, 24944-24953.
8. W. J. Kwak, D. Hirshberg, D. Sharon, H. J. Shin, M. Afri, J. B. Park, A. Garsuch, F. F. Chesneau, A. A. Frimer, D. Aurbach and Y. K. Sun, *J. Mater. Chem. A*, 2015, **3**, 8855-8864.
9. D. Sharon, V. Etacheri, A. Garsuch, M. Afri, A. A. Frimer and D. Aurbach, *J. Phys. Chem. Lett.*, 2013, **4**, 127-131.
10. D. Sharon, M. Afri, M. Noked, A. Garsuch, A. A. Frimer and D. Aurbach, *J. Phys. Chem. Lett.*, 2013, **4**, 3115-3119.
11. S. Di Tommaso, P. Rotureau, O. Crescenzi and C. Adamo, *Phys. Chem. Chem. Phys.*, 2011, **13**, 14636-14645.
